# Supplementary material for: Liver Metabolomics Reveals the Effect of Lactobacillus reuteri on Alcoholic Liver Disease
Source: PubMed Central journal article supplement (PMC7689281; doi:10.3389/fphys.2020.595382), 2020-11-12

Table 1 Weight of control and probiotics group

|                         | Control group   | Probiotics group |
|-------------------------|-----------------|------------------|
| Body weight             | 22.16 ± 0.62    | 22.09 ± 0.81     |
| Liver weight            | 1.160 ± 0.286   | 1.162 ± 0.159    |
| Liver/body weight ratio | 0.0524 ± 0.0006 | 0.0526 ± 0.0020  |

Table 2 Biochemical biomarkers of control and probiotics group

|     | Control group | Probiotics group |
|-----|---------------|------------------|
| ALT | 40.15 ± 3.67  | 39.62 ± 2.89     |
| AST | 88.33 ± 3.77  | 89.60 ± 6.11     |
| TG  | 0.51 ± 0.12   | 0.48 ± 0.02      |
| TCH | 1.93 ± 0.13   | 1.86 ± 0.05      |

HE staining

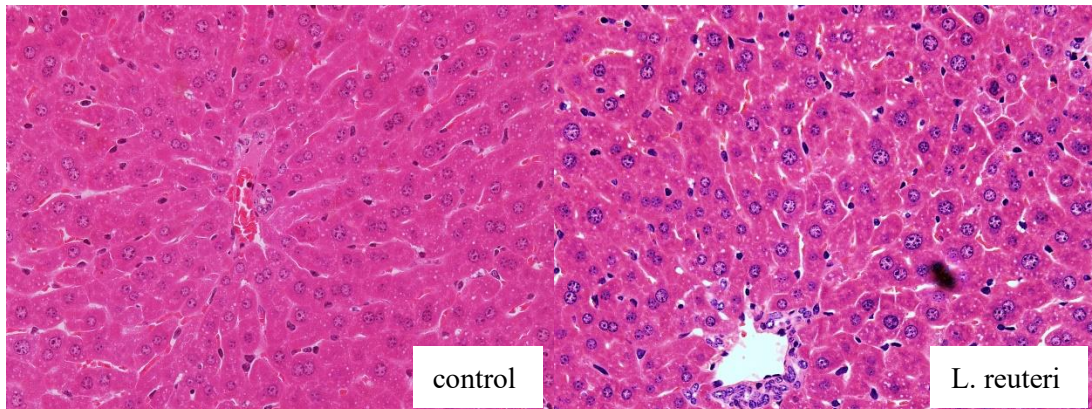

Oil red O staining

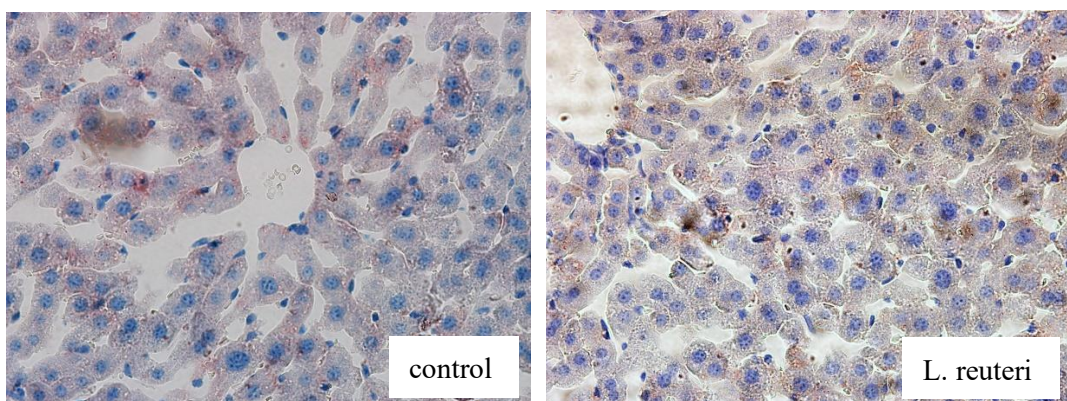

Supplement: Image_2.pdf [file Image_2.pdf]
